# Supplementary material for: Branched polyethyleneimine-assisted boronic acid-functionalized magnetic nanoparticles for the selective enrichment of trace glycoproteins
Source: Royal Society of Chemistry journal article supplement (doi:10.1039/c7an01174a), 2017-01-01
Supplement: c7an01174a1.pdf [file c7an01174a1.pdf]

*Supporting Information for*

**Branched polyethyleneimine-assisted boronic acid-functionalized magnetic nanoparticles for the selective enrichment of trace glycoproteins**

Daojin Li,<sup>a\*</sup> Zijun Bie<sup>b</sup>

<sup>a</sup>College of Chemistry and Chemical Engineering, and Henan Key Laboratory of Fuction-Oriented Porous Materials, Luoyang Normal University, Luoyang 471022, P. R. China. Address here. E-mail: lidaojin7910@126.com.

<sup>b</sup>Department of Chemistry Bengbu Medical College, 233030,

[illegible]

2

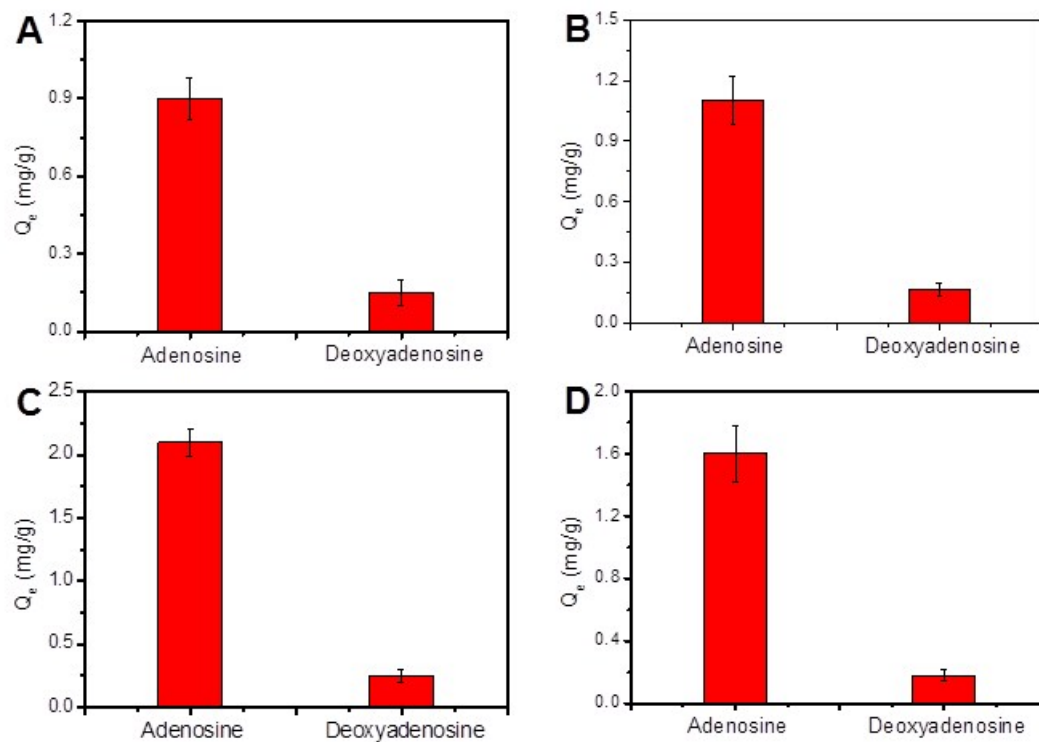

**Fig. S2** Comparison of the amount of different samples captured by PEIPBA-MNPs (PEI 600 (A), PEI 1800 (B), PEI 10000 (C), and PEI 70,000 (D). Binding buffer: 50 mM sodium phosphate buffer containing 300 mM sodium chloride (pH 7.4); elution solution: 100 mM HAc (pH 2.7); samples: 1 mg/mL adenosine or deoxyadenosine.

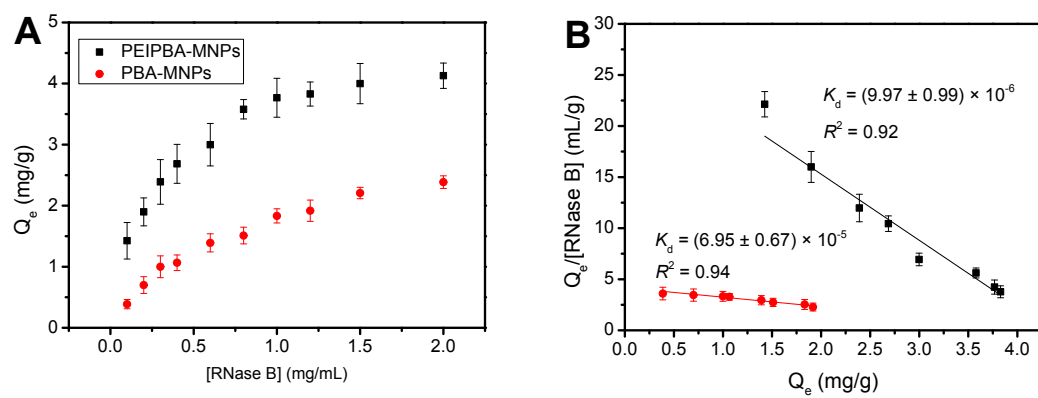

**Fig. S3** Binding isotherms (A) and Scatchard plots (B) for the binding of PEIPBA-MNPs and PBA-MNPs with RNase B.
